# Supplementary material for: The Role of Needle Fear in Pediatric Flu Vaccine Hesitancy: A Cross-Sectional Study in Bologna Metropolitan Area
Source: MDPI journal article supplement (doi:10.3390/vaccines10091388), 2022-08-25
Supplement: s1 [file s1]

## Supplementary Material

### Questionnaire (Translated from Italian)

- Q.1: "Are you a parent/guardian? Y or N"
- Q.2: "Do you live in the Bologna Metropolitan Area? Y or N"
- Q.3: "What is your gender? M, F or Other"
- Q.4: "How old are you?"
- Q.5: "What is your level of education? Middle School or lower; High School; University degree"
- Q.6: "When was your son/daughter born?"
- Q.7: "Do you have any 60+ year old family members? Y or N"
- Q.8: "How often does your son/daughter spend time with those family members? Rarely (once a week or less); Sometimes (more than once a week, but less than one hour a day); Often (at least one hour a day); Never"
- Q.9: "Do you have any family members with chronic diseases (e.g. diabetes, cardiovascular, pulmonary, neurological diseases, cancer etc.)? Y or N"
- Q.10: "How often does your son/daughter spend time with those family members? Rarely (once a week or less); Sometimes (more than once a week, but less than one hour a day); Often (at least one hour a day); Never"
- Q.11: "Did your son/daughter get fully vaccinated with all mandatory/recommended vaccinations? Y or N"
- Q.12: "Did your son/daughter get vaccinated during the 2021-2022 flu campaign? Y or N"
- Q.13: "Is your son/daughter affected by any chronic diseases? (e.g. neurological, pulmonary, cardiovascular, cancer, diabetes, etc.)? Y or N"
- Q.14: "Has your child ever shown fear/discomfort caused by the needle during a vaccination? Y or N"
- Q.15: "Has your pediatrician ever talked about/proposed/recommended flu vaccination for your child? Y or N"
- Q.16: "Have you ever heard of the possibility of pediatric flu vaccination in your community? Y or N"
- Q.17: "Do you think you will get your son/daughter vaccinated against influenza in the future? Y or N"
- Q.18: "Would you prefer to have your son/daughter vaccinated if the route of administration was a nasal spray instead of injection? Y or N"

**Table S1** – Association between covariates and "Would consider non-injective vaccination" variable

|                              | OR   | 95% C.I.    | p-value |
|------------------------------|------|-------------|---------|
| <b>Fear 1</b>                | 3.79 | 1.63 - 9.43 | 0.003   |
| <b>Awareness 1</b>           | 0.51 | 0.21 - 1.19 | 0.013   |
| <b>Pediatrician advice 1</b> | 0.60 | 0.22 - 1.51 | 0.028   |
| <b>Parents gender 1</b>      | 0.81 | 0.33 - 1.99 | 0.645   |
| <b>Parents age</b>           | 0.99 | 0.94 - 1.05 | 0.803   |
| <b>Parents edu 1</b>         | 0.81 | 0.30 - 2.19 | 0.685   |
| <b>Parents edu 2</b>         | 0.85 | 0.32 - 2.26 | 0.744   |

Analysis performed on subgroup of parents/guardians that responded that they would not get their children vaccinated in the future
